# Supplementary material for: Self-reported and self-facilitated theranostic oxygen nano-economizer for precise and hypoxia alleviation-potentiated photodynamic therapy
Source: Royal Society of Chemistry journal article supplement (doi:10.1039/d3mh01244a), 2023-01-01
Supplement: d3mh01244a1.pdf [file d3mh01244a1.pdf]

## Supporting Information

# Self-reported and Self-facilitated Theranostic Oxygen Nano-economizer for Precise and Hypoxia Alleviation-potentiated Photodynamic Therapy

**Authors:** Shumeng Li<sup>a</sup>, Fujun Yang<sup>b</sup>, Yongdan Wang<sup>a</sup>, Linshan Jia<sup>a</sup>, Xiaohong Hou<sup>c\*</sup>

### Affiliations:

<sup>a</sup>Department of Pharmaceutical Analysis, School of Pharmacy, Shenyang Pharmaceutical University, Shenyang 110016, P. R. China

<sup>b</sup>Department of Pharmaceutics, Wuya College of Innovation, Shenyang Pharmaceutical University, Shenyang 110016, P. R. China

<sup>c</sup>School of Pharmaceutical Engineering, Shenyang Pharmaceutical University, Shenyang, Liaoning Province 110016, P. R. China

### \*Corresponding author:

Prof Xiaohong Hou, Ph.D.

School of Pharmaceutical Engineering, Shenyang Pharmaceutical University,  
Shenyang, Liaoning Province 110016, P. R. China

Fax: +024-43520212

E-mail address: [syphu\\_houxiaohong@163.com](mailto:syphu_houxiaohong@163.com)

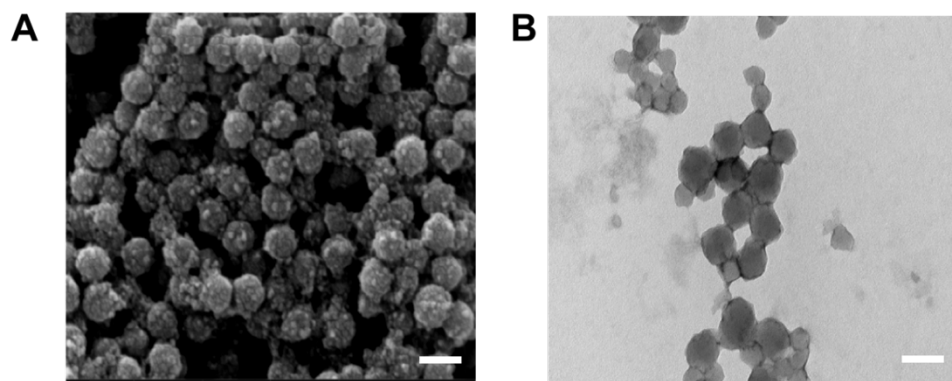

**Figure S1.** (A) SEM image and (B)TEM image of DPA-MOF, scale bar = 200 nm.

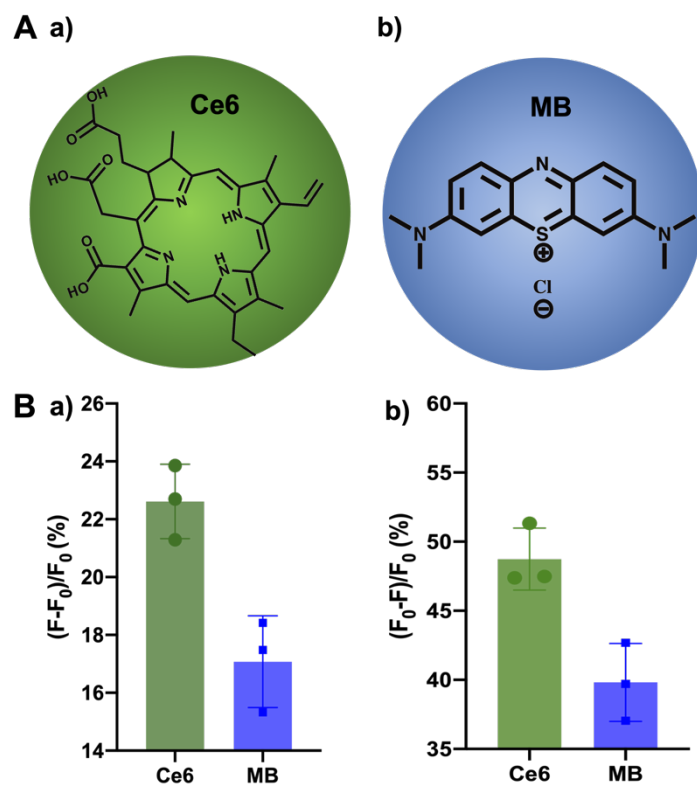

**Figure S2.** (A) Chemical structures of (a) Ce6 and (b) MB; and (B) Singlet oxygen generated by Ce6 and MB were reported via (a) SOSG probe and (b) DPA-MOF under laser (660 nm, 50 mW/cm<sup>2</sup>).

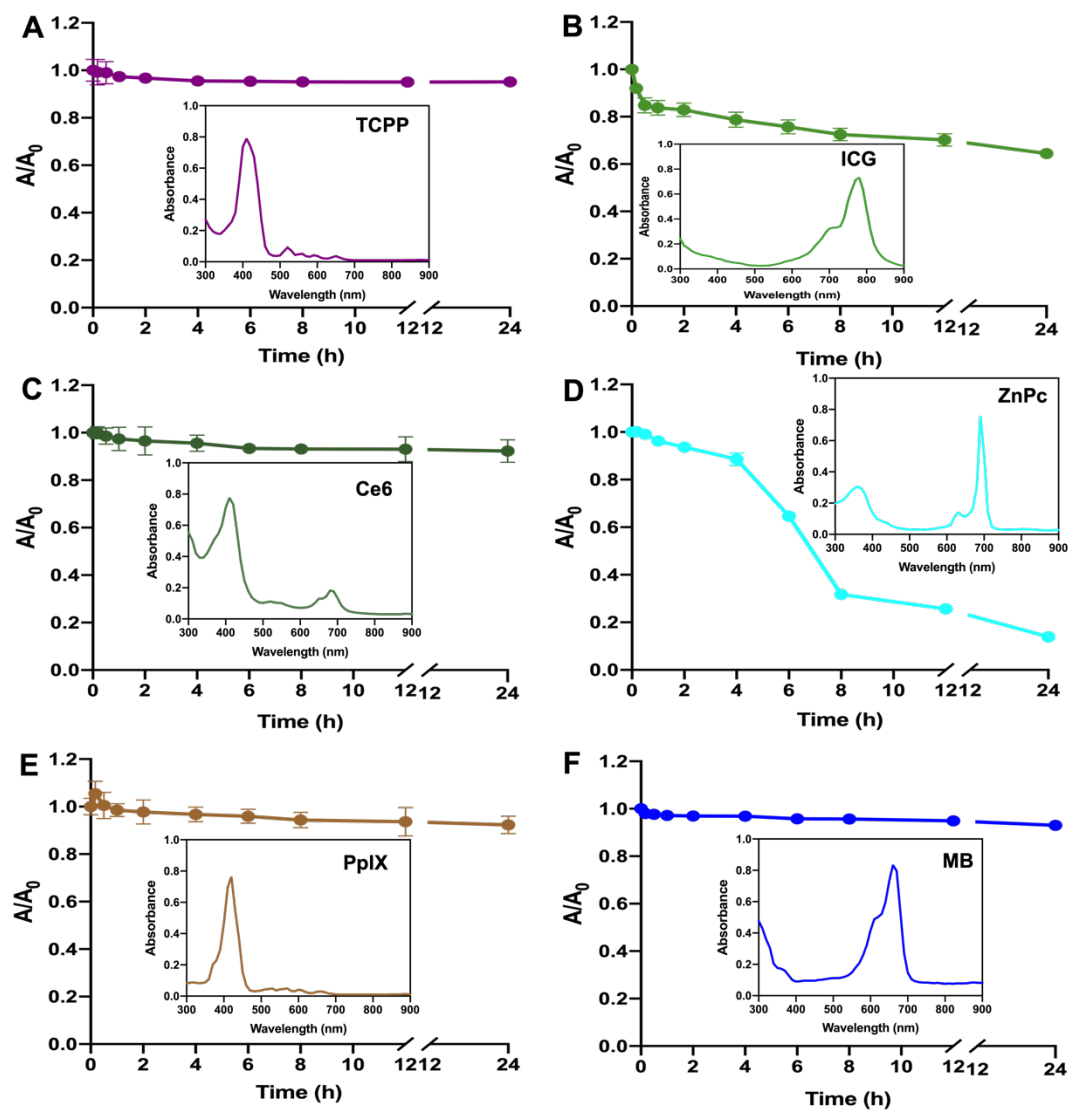

**Figure S3.** Photostability of (A) TCPP, (B) ICG, (C) Ce6, (D) ZnPc, (E) PpIX and (F) MB upon laser irradiation (660 nm, 50 mW/cm²),  $A_0$  is the initial absorbance maximum and  $A$  is the absorbance maximum of the samples.

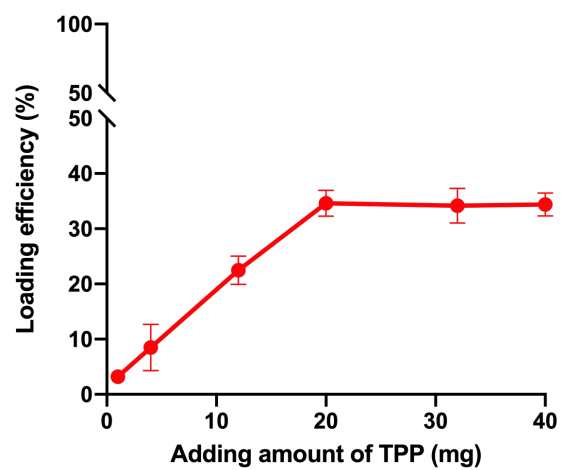

**Figure S4.** Loading efficiency of TPP with different adding amount.

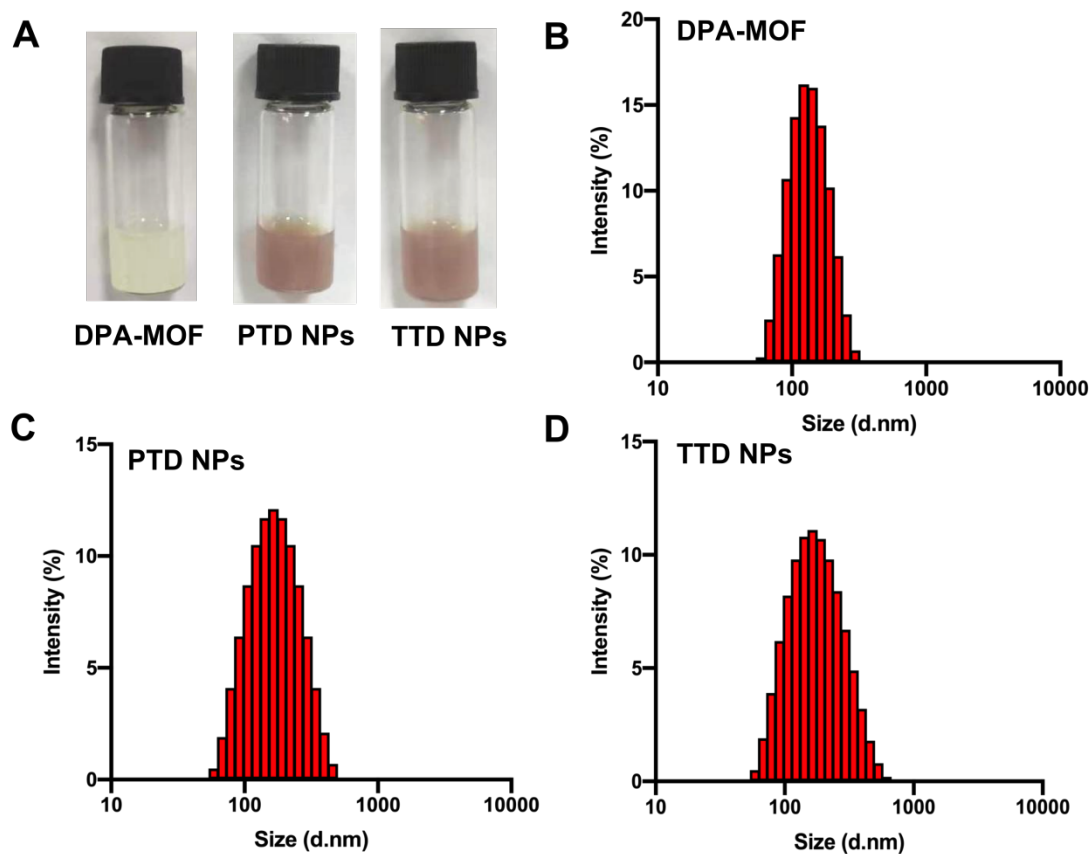

**Figure S5.** Appearance photos and particle size distribution profiles of DPA-MOF, PTD NPs and TTD NPs.

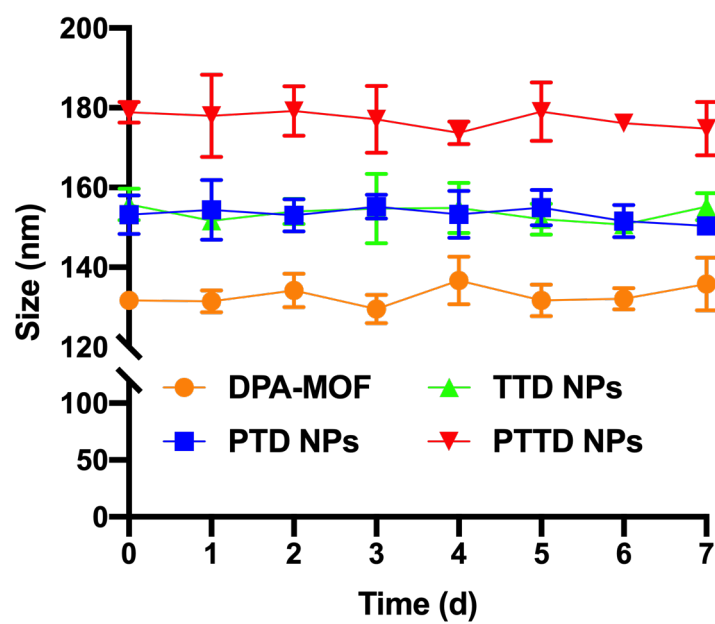

**Figure S6.** Long-term stability of DPA-MOF, PTD NPs, TTD NPs and PTTD NPs stored at 4 °C refrigerator for one week.

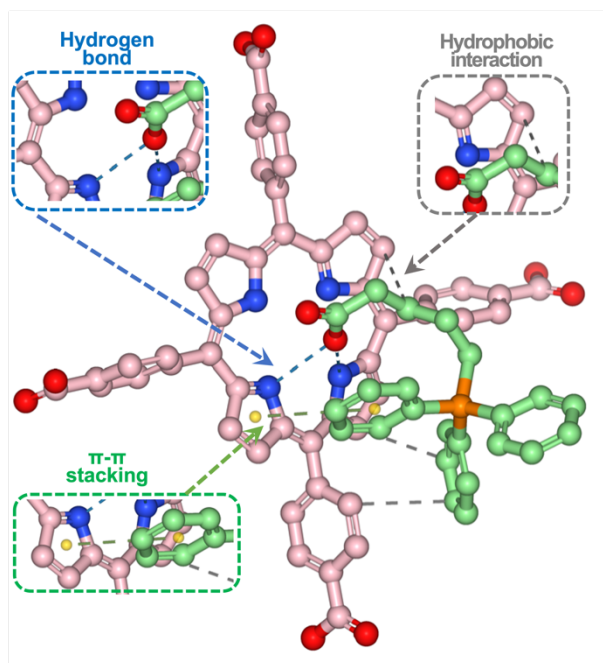

**Figure S7.** Molecular docking simulation of TCPP and TPP.



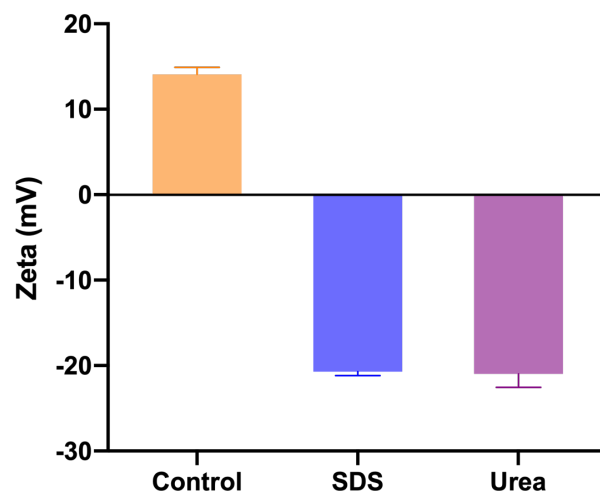

**Figure S8.** Zeta potential changes of TTD NPs treated with SDS (200 mM) and urea (200 mM).

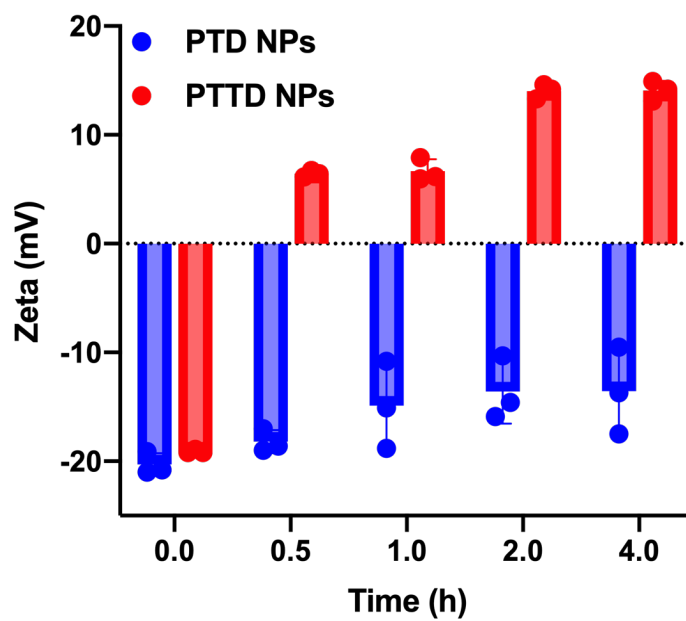

**Figure S9.** Zeta potential changes of PTD NPs and PTTD NPs in the presence of DTT (1 mM).

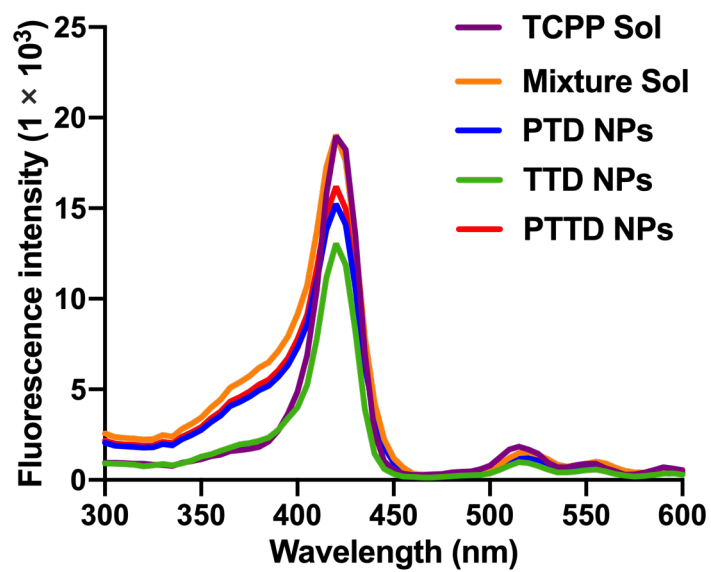

**Figure S10.** Fluorescence excitation peak of TCPP solution, mixture solution of DPA-MOF and TCPP, PTD NPs, TTD NPs and PTTD NPs.

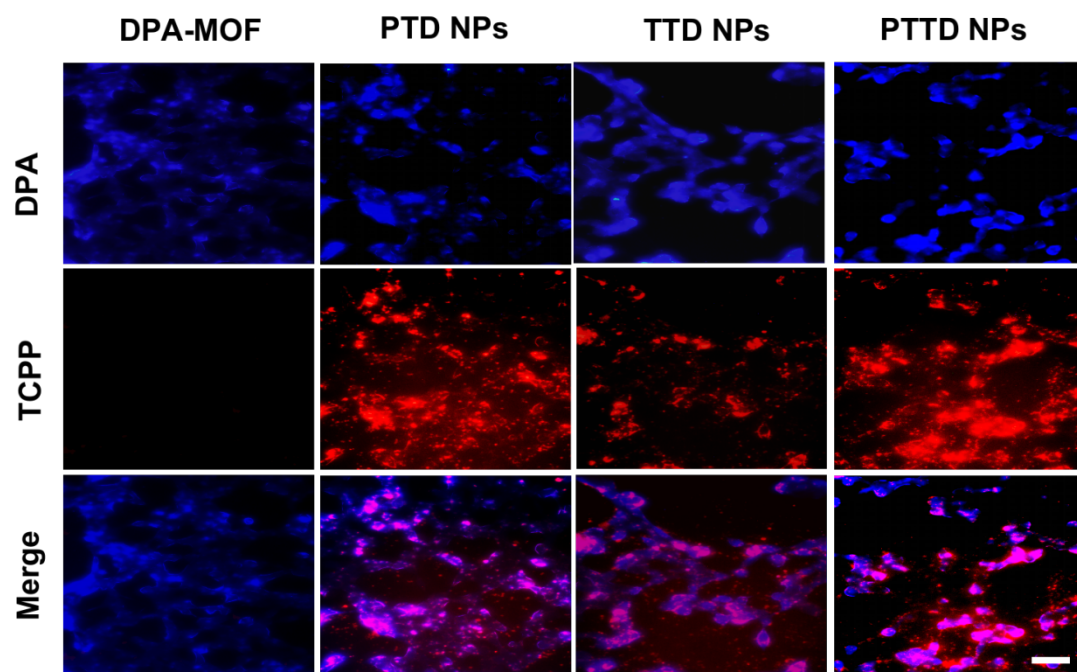

**Figure S11.** Fluorescence colocalization of TCPP and DPA-MOF in 4T1 cells, scale bar = 20  $\mu\text{m}$ .

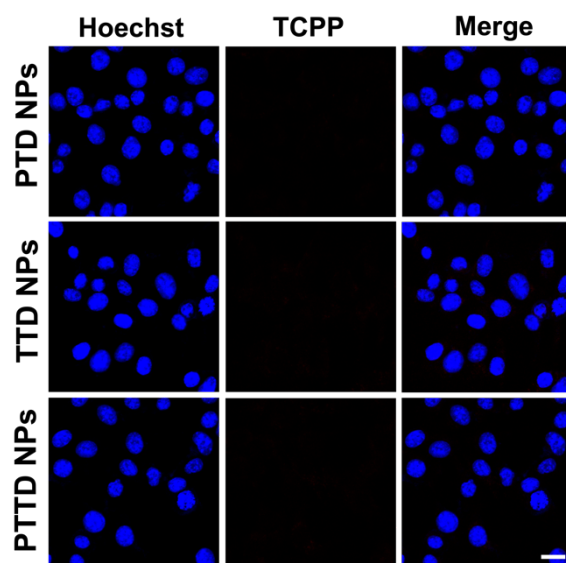

**Figure S12.** Cellular uptake: confocal imaging of 4T1 cells treated with PTD NPs, TTD NPs and PTTD NPs for 0 h, scale bar = 10  $\mu\text{m}$ .

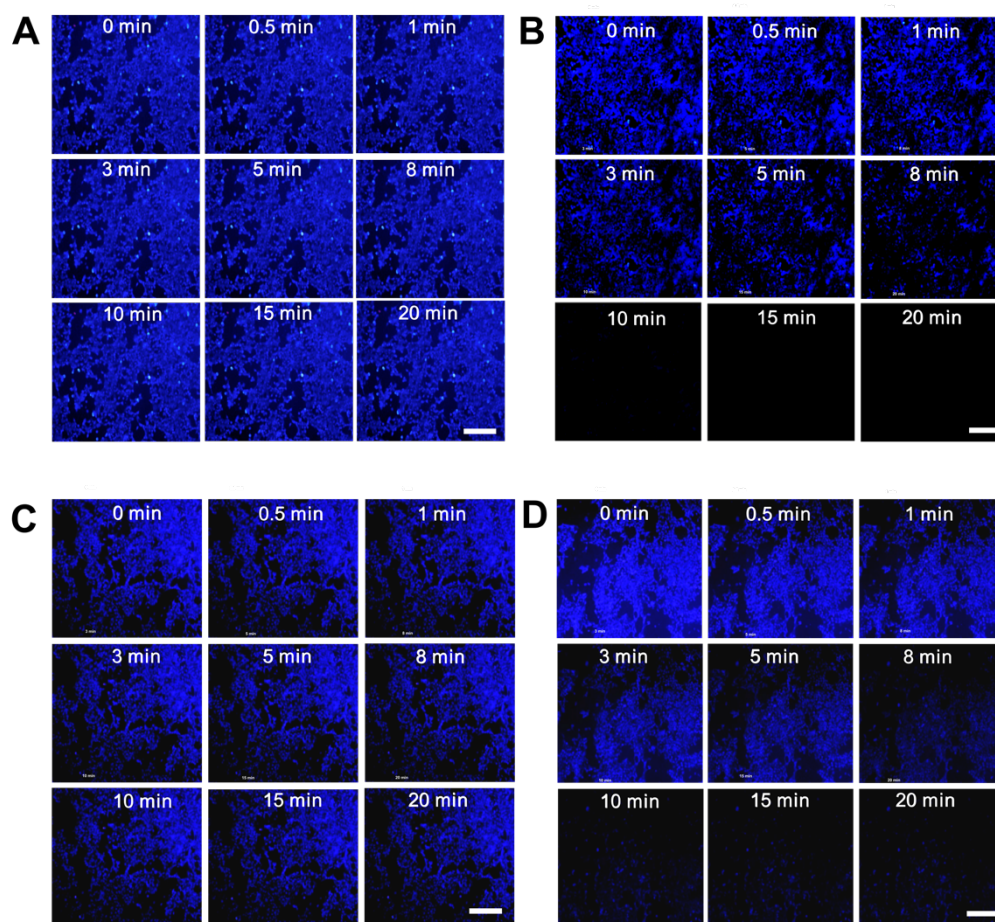

**Figure S13.** Dynamic fluorescence changes of 4T1 cells treated with (A) DPA-MOF, (B) PTD NPs, (C) TTD NPs and (D) PTDD NPs with laser (660 nm, 50 mW/cm<sup>2</sup>).

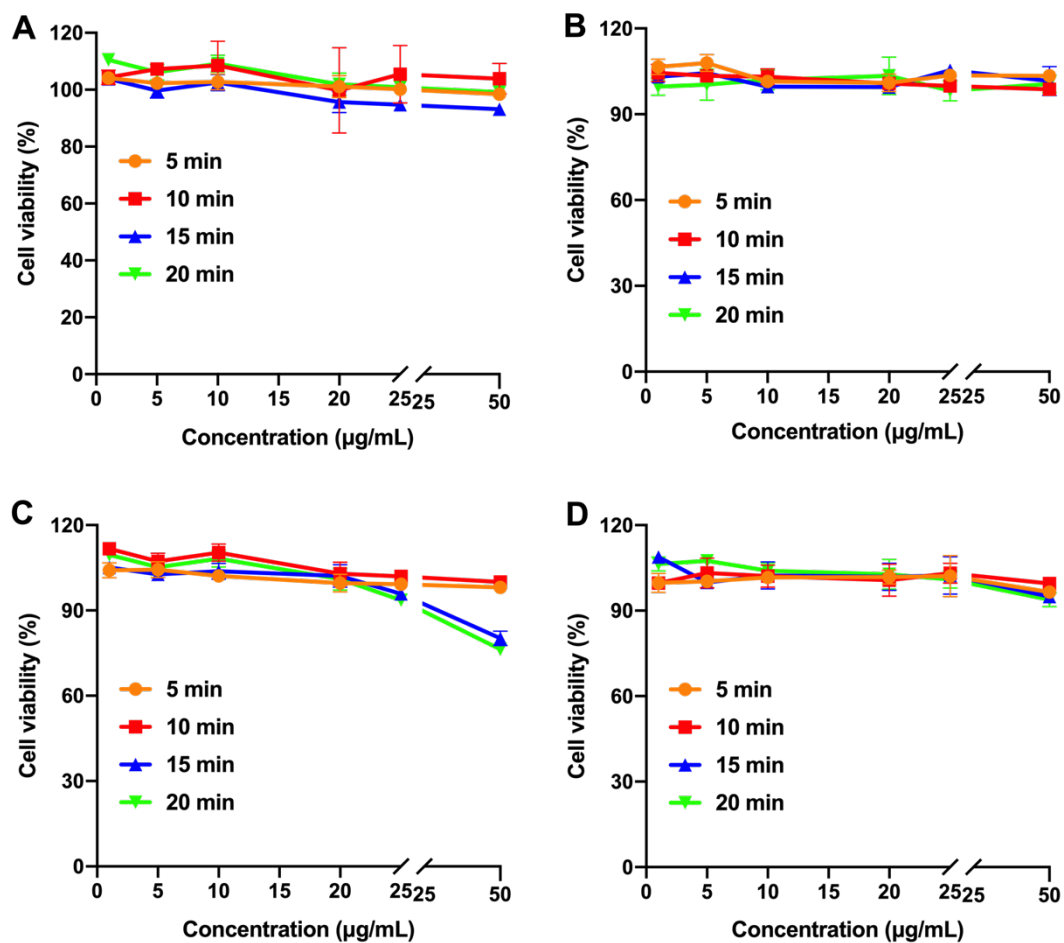

**Figure S14.** Cytotoxicity against (A) 4T1 cells treated with DPA-MOF and cytotoxicity against 3T3 cells treated with (B) DPA-MOF, (C) PTD NPs, and (D) TTD NPs with laser irradiation in 5, 10, 15, 20 min (660 nm, 50 mW/cm<sup>2</sup>).

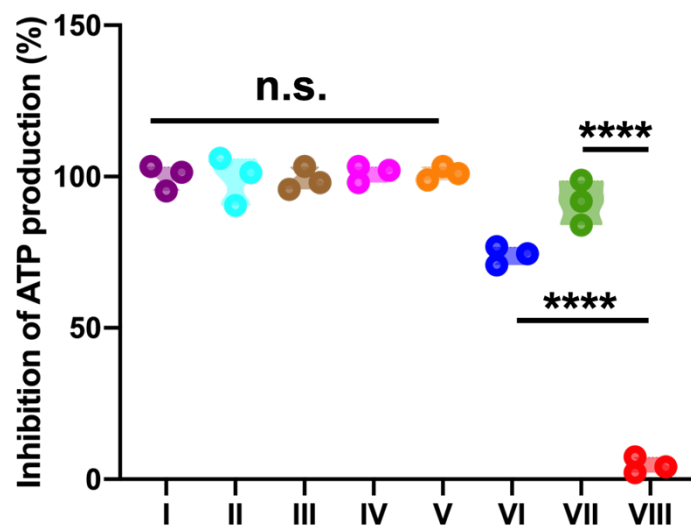

**Figure S15.** The ATP content after treatment by different formulations, (I, PBS; II, PTD NPs; III, TTD NPs; IV, PTTD NPs; V, PBS + L; VI, PTD NPs + L; VII, TTD NPs + L; VIII, PTTD NPs + L). Error bars represent  $\pm$  SD. Statistics: \*\*\*\*P < 0.0001.



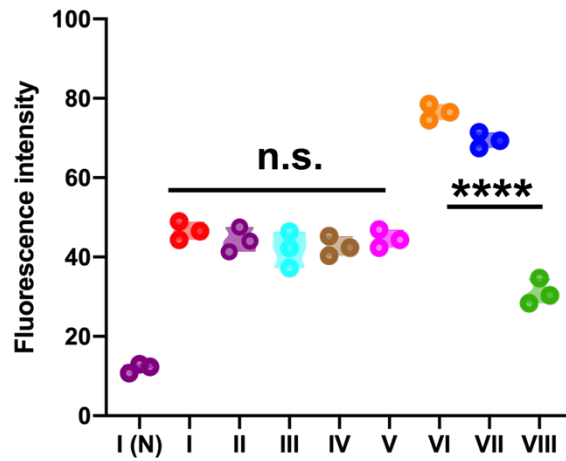

**Figure S16.** Quantitative analysis of HIF-1 $\alpha$  expression in 4T1 cells under normoxia and hypoxia conditions (I (N), PBS (Normoxia); I, PBS; II, PTD NPs; III, TTD NPs; IV, PTTD NPs; V, PBS + L; VI, PTD NPs + L; VII, TTD NPs + L; VIII, PTTD NPs + L). Error bars represent  $\pm$  SD. Statistics: \*\*\*\*P < 0.0001.

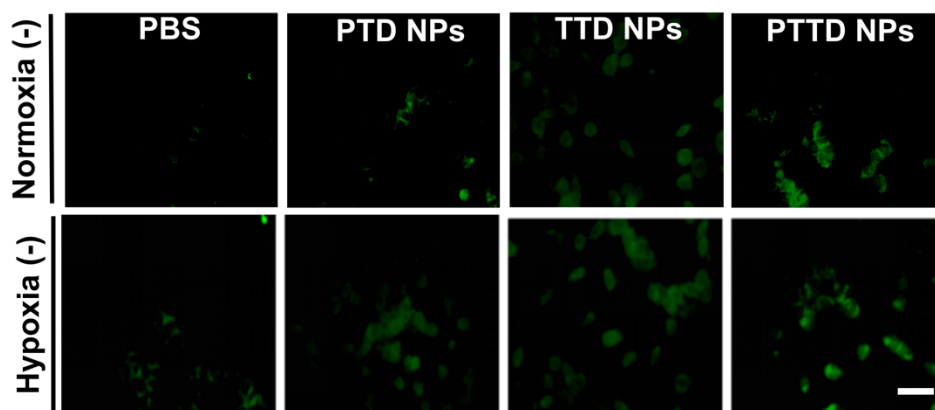

**Figure S17.** Cellular ROS generation in 4T1 cells treated with PBS, PTD NPs, TTD NPs and PTTD NPs without laser under normoxia and hypoxia conditions, scale bar = 20  $\mu\text{m}$ .

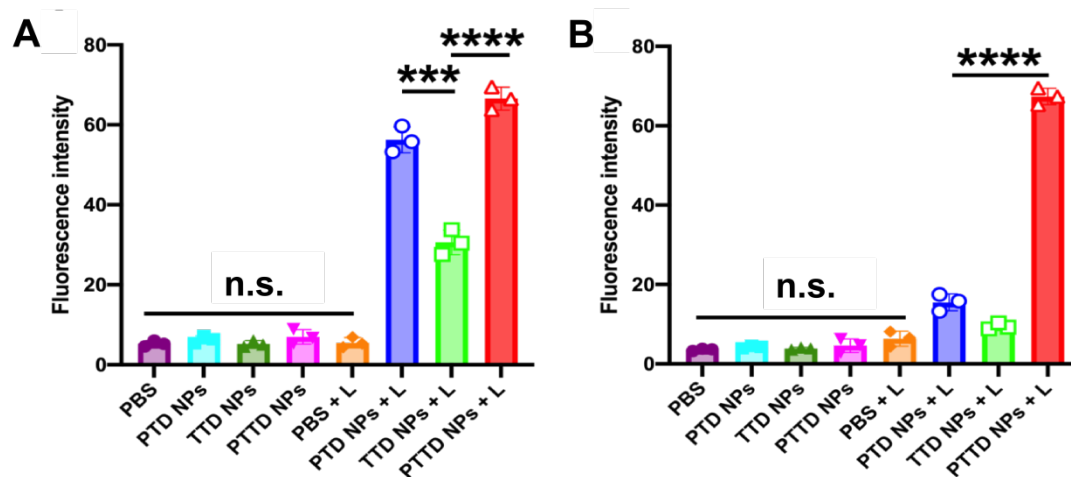

**Figure S18.** Quantitative analysis of cellular singlet oxygen generation in 4T1 cells under (A) normoxia and (B) hypoxia conditions. Error bars represent  $\pm$  SD. Statistics: \*\*\* $P < 0.001$  and \*\*\*\* $P < 0.0001$ .

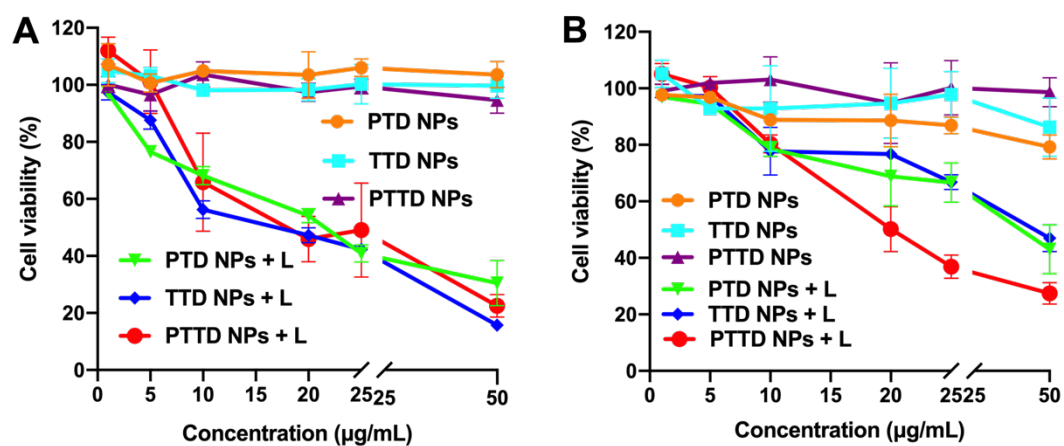

**Figure S19.** Cytotoxicity against CT26 cells with or without laser irradiation under (A) normoxic and (B) hypoxic conditions (660 nm, 50 mW/cm²).

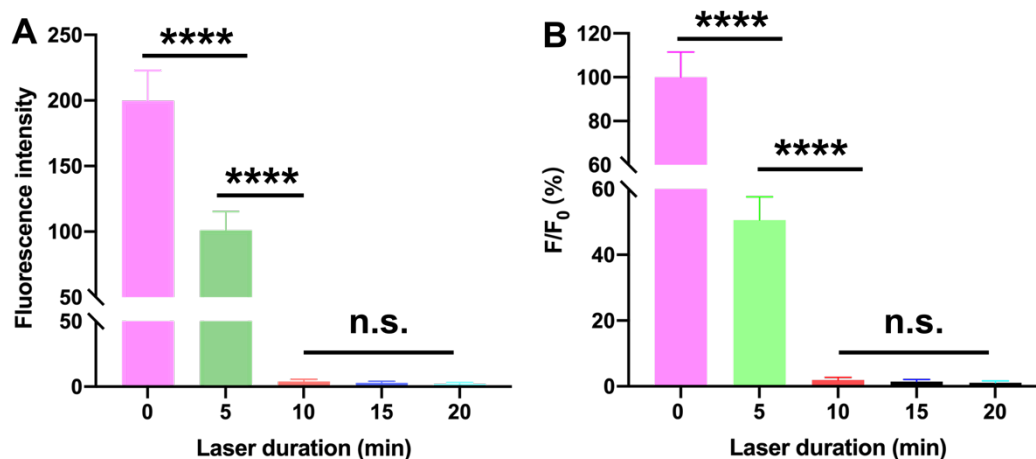

**Figure S20.** Fluorescence quantification of PTTD NPs at different laser duration (660 nm, 50 mW/cm<sup>2</sup>). (A) Quantitative fluorescence values of PTTD NPs + L (0, 5, 10, 15, 20 min); and (B) Fluorescence percentage of PTTD NPs at different laser duration, (F, fluorescence value of PTTD NPs at 0, 5, 10, 15 and 20 min under laser; F<sub>0</sub>, the initial fluorescence value of PTTD NPs). Statistics: \*\*\*\*P < 0.0001.

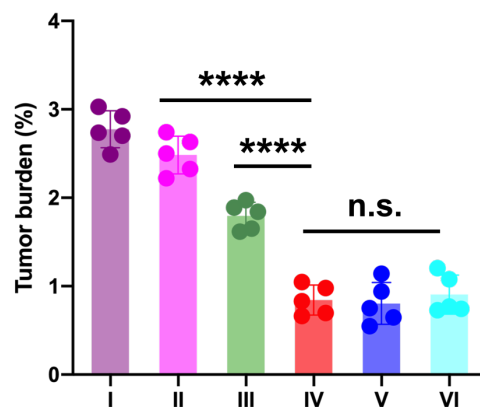

**Figure S21.** Tumor burden at 11 days post-administration. I, saline; II, PTTD NPs + L (0 min); III, PTTD NPs + L (5 min); IV, PTTD NPs + L (10 min); V, PTTD NPs + L (15 min); VI, PTTD NPs + L (20 min). Statistics: \*\*\*\* $P < 0.0001$ .

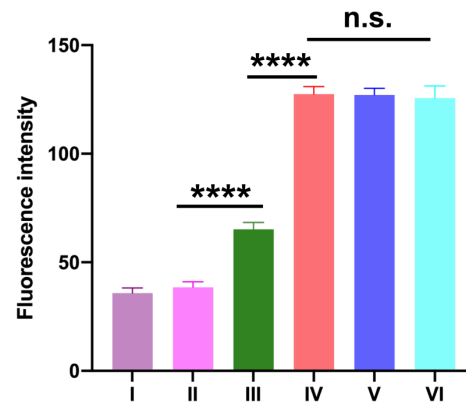

**Figure S22.** Quantitative results of TUNEL assay. I, saline; II, PTTD NPs + L (0 min); III, PTTD NPs + L (5 min); IV, PTTD NPs + L (10 min); V, PTTD NPs + L (15 min); VI, PTTD NPs + L (20 min). Statistics: \*\*\*\* $P < 0.0001$ .

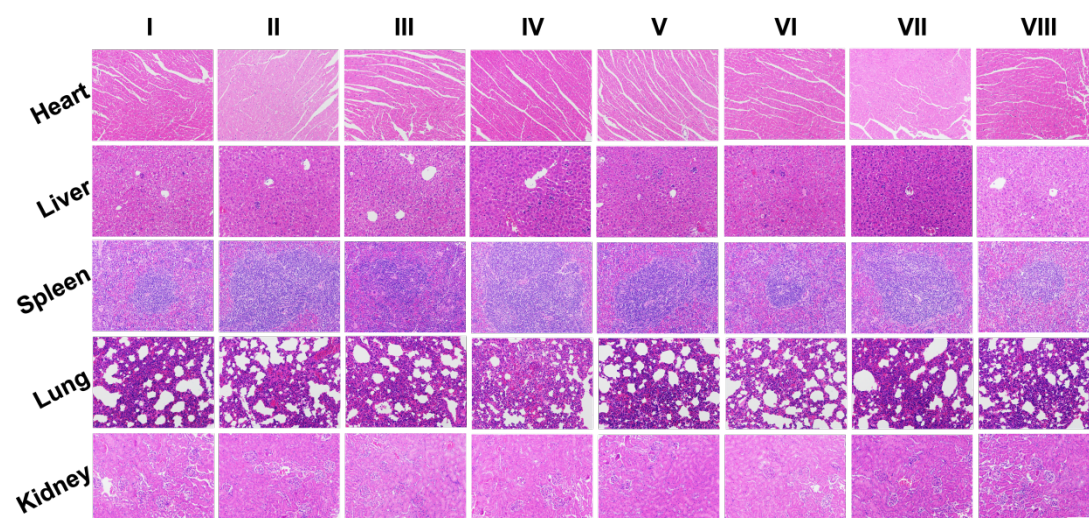

**Figure S23.** H&E staining images of heart, lung, spleen, lung and kidney after treatments. H&E staining: 200 $\times$  magnification. Scale bar = 100  $\mu$ m.



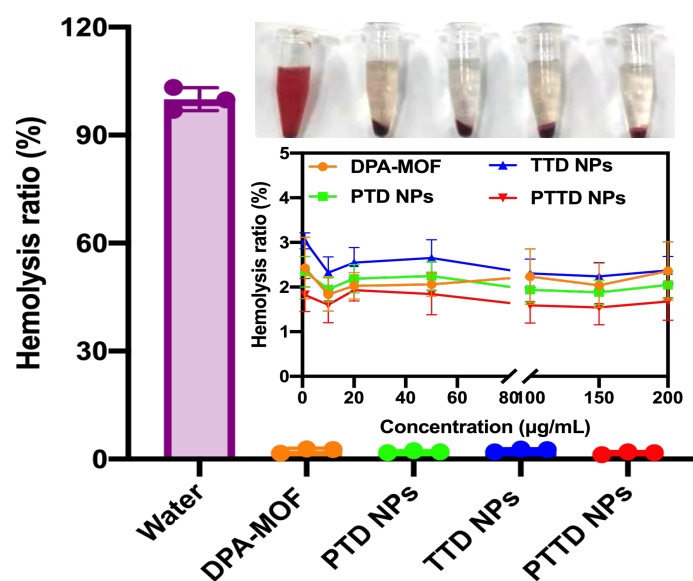

**Figure S24.** Hemolysis assay after incubation with DPA-MOF, PTD NPs, TTD NPs and PTTD NPs with concentration of 200  $\mu\text{g/mL}$ .

**Table S1.** Singlet oxygen detection of DPA and DPA-MOF.

| Probe   | Linear range | Linear equation              | Correlation | LOD                  |
|---------|--------------|------------------------------|-------------|----------------------|
| DPA     | 0-3 mM       | $y = 0.2781 \cdot x + 1.003$ | 0.9906      | 244.74 $\mu\text{M}$ |
| DPA-MOF | 0-4 mM       | $y = 1.490 \cdot x + 1.591$  | 0.9908      | 49.46 $\mu\text{M}$  |

**Table S2.** Screening the optimal dose of TPP at various mass ratios.

| Applied TD NPs | Added TPP | TD NPs: TPP | <sup>a)</sup> LE (%) of TPP | <sup>b)</sup> EE (%) of TPP |
|----------------|-----------|-------------|-----------------------------|-----------------------------|
| 4 mg           | 1.33 mg   | 3:1         | 3.20%                       | 9.97%                       |
| 4 mg           | 4 mg      | 1: 1        | 8.48%                       | 9.42%                       |
| 4 mg           | 12 mg     | 1: 3        | 22.48%                      | 9.70%                       |
| 4 mg           | 20 mg     | 1: 5        | 34.61%                      | 10.61%                      |
| 4 mg           | 32 mg     | 1: 8        | 34.18%                      | 6.52%                       |
| 4 mg           | 40 mg     | 1: 10       | 34.38%                      | 5.25%                       |

<sup>a)</sup>Loading efficiency (LE):  $WL/WNP \times 100$ ; <sup>b)</sup>Encapsulated efficiency (EE):  $WL/WT \times 100$ ; (WL, weight of loading drugs; WT, weight of total drugs; and WNP, weight of nanoparticles).

**Table S3.** Characterization of DPA-MOF, PTD NPs, TTD NPs and PTTD NPs.

| Nanoassemblies | <sup>a)</sup> Size (nm) | <sup>b)</sup> PDI | <sup>c)</sup> DL <sub>DPA</sub> | <sup>c)</sup> DL <sub>TCPP</sub> | <sup>c)</sup> DL <sub>TPP</sub> | <sup>d)</sup> Zeta (mV) |
|----------------|-------------------------|-------------------|---------------------------------|----------------------------------|---------------------------------|-------------------------|
| DPA-MOF        | 135.0 ± 4.10            | 0.18 ± 0.05       | 73.98%                          | –                                | –                               | -6.53 ± 0.33            |
| PTD NPs        | 156.4 ± 2.47            | 0.18 ± 0.05       | 49.90%                          | 22.50%                           | –                               | -10.2 ± 0.65            |
| TTD NPs        | 155.8 ± 3.96            | 0.12 ± 0.06       | 40.77%                          | 18.38%                           | 34.64%                          | 14.0 ± 0.77             |
| PTTD NPs       | 178.9 ± 2.59            | 0.16 ± 0.04       | 32.62%                          | 14.70%                           | 27.71%                          | -19.0 ± 0.21            |

<sup>a)</sup> Mean diameters of nanoassemblies were determined by DLS. <sup>b)</sup> Polydispersity index of micelles size. <sup>c)</sup> Drug-loading of DPA, TCPP or TPP was calculated by the weight of drugs, nanoparticles and the amount of DSPE-SS-PEG<sub>2k</sub>. <sup>d)</sup> Zeta potential of nanoassemblies were determined by DLS.

**Table S4.** Cytotoxicity IC<sub>50</sub> (µg/mL) values of PTD NPs, TTD NPs and PTTD NPs under different laser duration in 4T1 cells (MTT assay).

| Laser duration | 5 min | 10 min | 15 min | 20 min |
|----------------|-------|--------|--------|--------|
| PTD NPs        | 28.52 | 17.46  | 17.29  | 17.42  |
| TTD NPs        | 30.24 | 23.84  | 23.38  | 23.77  |
| PTTD NPs       | 14.83 | 7.52   | 7.68   | 7.60   |

**Table S5.** Cytotoxicity IC<sub>50</sub> values of PTD NPs, TTD NPs and PTTD NPs under laser (MTT assay).

| Formulations | 4T1 (μg/mL) |           | CT26 (μg/mL) |           |
|--------------|-------------|-----------|--------------|-----------|
|              | Normoxia    | Hypoxia   | Normoxia     | Hypoxia   |
|              | Laser (+)   | Laser (+) | Laser (+)    | Laser (+) |
| PTD NPs      | 17.23       | 101.90    | 27.69        | 104.20    |
| TTD NPs      | 23.62       | 100.90    | 28.74        | 181.60    |
| PTTD NPs     | 7.47        | 8.53      | 12.51        | 14.14     |
